# Supplementary material for: Inverse modeling of SO 2 and NO x emissions over China using multi-sensor satellite data: 1. formulation and sensitivity analysis
Source: Copernicus journal article supplement (doi:10.5194/acp-2019-879), 2019-11-12
Supplement: Supplementary file 1 [file acp-2019-879-supplement.pdf]

# Inverse modeling of SO<sub>2</sub> and NO<sub>x</sub> emissions over China using multi-sensor satellite data: 1. formulation and sensitivity analysis

5 Yi Wang<sup>1</sup>, Jun Wang<sup>1,2</sup>, Xiaoguang Xu<sup>2,3</sup>, Daven K. Henze<sup>4</sup>, Zhen Qu<sup>4</sup>

<sup>1</sup>Interdisciplinary Graduate Program in Informatics, The University of Iowa, Iowa City, IA 52242, USA

<sup>2</sup>Department of Chemical and Biochemical Engineering, and Center for Global & Regional Environmental Research, The University of Iowa, Iowa City, IA 52242, USA

<sup>3</sup>Joint Center for Earth Systems Technology and Department of Physics, University of Maryland Baltimore County, Baltimore, Maryland, 21250, USA

<sup>4</sup>Department of Mechanical Engineering, University of Colorado Boulder, Boulder, CO 80309, USA

Correspondence to: Jun Wang ([jun-wang-1@uiowa.edu](mailto:jun-wang-1@uiowa.edu)) and Yi Wang ([yi-wang-4@uiowa.edu](mailto:yi-wang-4@uiowa.edu))

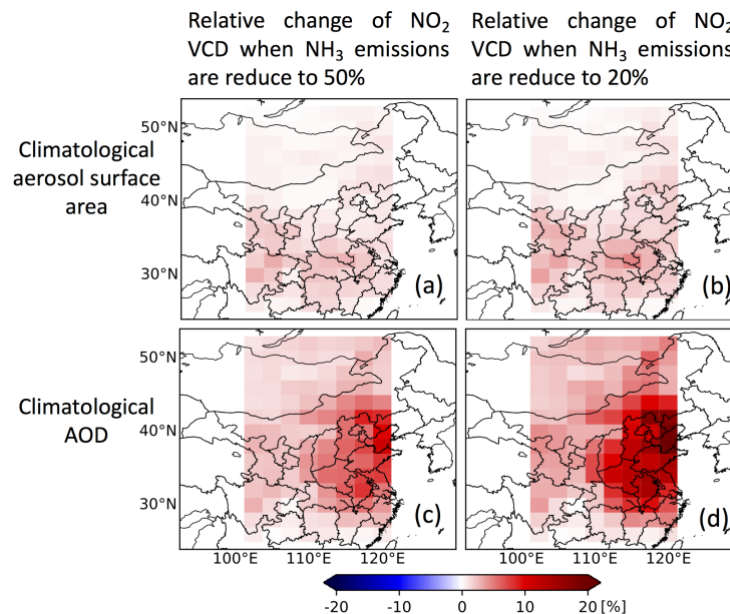

15

Figure S1. Relative change of GEOS-Chem NO<sub>2</sub> VCDs when NH<sub>3</sub> emissions reduce to 50% (a) and 20% (b), respectively at OMPS overpassing time, and a dataset of climatological aerosol surface area is used, regardless of scenarios of NH<sub>3</sub> emissions. (c) and (d) are similar to (a) and (b), respectively, but a dataset of climatological AOD rather than climatological aerosol surface area is used.

20

25 Figure S1 a and b show the relative change GEOS-Chem NO<sub>2</sub> VCDs with NH<sub>3</sub> emissions reducing to 50% and 20%, respectively, in the situation that a dataset of climatological aerosol surface area is used, regardless of scenarios of NH<sub>3</sub> emissions, hence reflecting the impact of photolysis of O<sub>3</sub> and NO<sub>2</sub> on NO<sub>2</sub> lifetime when NH<sub>3</sub> emissions are reduced. The situation that a dataset of climatological AOD is used is shown in Fig. S1 c and d ; thus they are the impact of N<sub>2</sub>O<sub>5</sub> chemistry on NO<sub>2</sub> lifetime. Apparently, the impact of photolysis of O<sub>3</sub> and NO<sub>2</sub> on NO<sub>2</sub> lifetime caused by the reduction of NH<sub>3</sub> emissions is negligible compared to that of N<sub>2</sub>O<sub>5</sub> chemistry.
